# Supplementary material
Source: publisher figshare collection journal article supplement (https://plos.figshare.com/articles/dataset/_/5855031)
Supplement: Supplementary file 1 [file 1]

Archive with 13 entries (13 files):
- S1 Table.pdf
- S2 Table.pdf
- S3 Table.pdf
- S4 Table.pdf
- S5 Table.pdf
- S6 Table.pdf
- S7 Table.pdf
- S8 Table.pdf
- S9 Table.pdf
- S10 Table.pdf
- S11 Table.pdf
- S1 Fig.tif
- S1 File.xls
