# Supplementary material
Source: publisher figshare collection journal article supplement (https://plos.figshare.com/articles/dataset/_/5855031)
Supplement: Supplementary file 1 [file 1 › S1 File.xls]

## Sheet: control
Smoking history	Total cell count (x104/ml BALF)	Macrophages(%)	Macrophages(x10^4/ml)	Lymphocytes(%)	Lymphocytes(x10^4/ml)	Neutrophils(%)	Neutrophils(x10^4/ml)	Eosinophils(%)	Eosinophils(x10^4/ml)	CD4+lymphocytes(x104/ml BALF)	CD8+lymphocytes(x104/ml BALF)	BAL CD4(%)	BAL CD8(%)	BAL CD4/CD8	peripheral WBC(/µl)	peripheral neutrophils(/µl)	peripheral lymphocytes(/µl)	peripheral monocytes(/µl)	peripheral eosinophils(/µl)	BAL IL-6 (pg/ml)	BAL IL-8 (pg/ml)	BAL IL-12 (pg/ml)	BAL IFNγ (pg/ml)	BAL IL-22 (pg/ml)	BAL IL-18 (pg/ml)
Never smoker	9.86	98.4	9.70224	1.6	0.15776	0	0	0	0	0.11201	0.0411754	71	26.1	2.72	4800	2697.6	1526.4	316.8	249.6	1.15322	45.5765	1.14924	9.70488	13.8691	15.3253
Never smoker	7.86	94.4	7.41984	3.2	0.25152	2.2	0.17292	0	0	0.161476	0.062377	64.2	24.8	2.59	5600	3869.6	1349.6	229.6	123.2	0.939099	12.1074	1.28536	4.22023	10.7684	13.6555
Never smoker	11.31	96.8	10.9481	2.5	0.28275	0.6	0.06786	0	0	0.139961	0.0822802	49.5	29.1	1.7	6700	4442.1	1541	475.7	221.1	0.35	12.1977	1.24685	7.88043	13.1518	26.5537
Never smoker	6.1	73.2	4.4652	25.9	1.5799	0.5	0.0305	0.5	0.0305	0.804169	0.661978	50.9	41.9	1.21	-	-	-	-	-	0.35	13.0627	0.05	4.71377	11.1184	6.25
Never smoker	11.4	89	10.146	10.7	1.2198	0.3	0.0342	0	0	0.398875	0.502558	32.7	41.2	0.79	-	-	-	-	-	0.35	10.8605	0.05	2	14.3515	6.25
Never smoker	17.4	95.7	16.6518	2.6	0.4524	1.7	0.2958	0	0	0.229819	0.083694	50.8	18.5	2.75	-	-	-	-	-	0.35	7.70437	0.05	2	4	6.25
Never smoker	3.4	87.7	2.9818	12.3	0.4182	0	0	0	0	0.219973	0.145534	52.6	34.8	1.51	-	-	-	-	-	0.35	1	0.05	2	4	6.25
Never smoker	10.6	82.1	8.7026	17.6	1.8656	0.3	0.0318	0	0	0.49625	1.23876	26.6	66.4	0.4	-	-	-	-	-	0.35	1	0.05	2	4	6.25
Never smoker	22.2	86.8	19.2696	9.9	2.1978	3.9	0.8658	0	0	1.39341	0.582417	63.4	26.5	2.39	-	-	-	-	-	0.35	16.0245	0.05	10.3645	4	6.25
Never smoker	6.5	91.2	5.928	7.6	0.494	0.4	0.026	0.8	0.052	0.287014	0.149188	58.1	30.2	1.92	5300	3445	932.8	270.3	593.6	1.11198	3.06003	1.40256	2	4	6.25
Ex-smoker	18.61	92.8	17.2701	5.6	1.04216	1.6	0.29776	0	0	0.697205	0.259498	66.9	24.9	2.69	3300	2013	891	264	132	0.35	27.5969	1.32296	12.8415	16.9893	17.4523
Ex-smoker	18.6	96.6	17.9676	3.4	0.6324	0	0	0	0	0.449636	0.158732	71.1	25.1	2.83	3300	1485	1356.3	435.6	13.2	0.35	4.12147	0.05	8.45083	4	6.25
Ex-smoker	44.5	96.4	42.898	3.2	1.424	0.4	0.178	0	0	0.821648	0.472768	57.7	33.2	1.74	6000	3024	2088	480	378	0.35	29.7779	0.427941	16.3933	12.3663	455.567
Never smoker	16.14	97.6	15.7526	2	0.3228	0.4	0.06456	0	0	0.191743	0.105878	59.4	32.8	1.81	7200	4680	1728	720	72	0.35	11.4508	5.08187	31.3173	12.3754	28.1554
Never smoker	11.31	96.8	10.9481	2.5	0.28275	0.6	0.06786	0	0	0.139961	0.0822802	49.5	29.1	1.7	6700	4442.1	1541	475.7	221.1	0.35	12.7074	0.05	22.292	12.3833	19.8791
Never smoker	4.68	98.3	4.60044	1.6	0.07488	0	0	0	0	0.0409594	0.0287539	54.7	38.4	1.42	6900	4064.1	1911.3	434.7	469.2	0.35	17.8056	1.22412	18.413	4	6.25
Ex-smoker	7.03	96.8	6.80504	1.9	0.13357	0	0	1.3	0.09139	0.0758678	0.0492873	56.8	36.9	1.54	4800	2380.8	2049.6	192	148.8	0.35	14.4906	1.69726	13.8222	9.80172	15.6554
Never smoker	6.89	95.3	6.56617	4.3	0.29627	0	0	0.3	0.02067	0.15969	0.0971766	53.9	32.8	1.64	4400	2714.8	1280.4	242	140.8	0.762684	16.3005	1.27091	7.53231	13.1576	17.933
Never smoker	10.78	82	8.8396	18	1.9404	0	0	0	0	0.731531	0.993485	37.7	51.2	0.74	4800	3072	1104	288	336	0.35	25.3795	1.42851	18.1725	4	21.5445
Never smoker	10.91	84.7	9.24077	13.5	1.47285	1.5	0.16365	0.3	0.03273	0.96619	0.466893	65.6	31.7	2.07	5000	2835	1780	335	30	0.832172	51.5676	1.23569	12.0058	19.0877	30.1438
Current smoker	12.67	92.4	11.7071	6.8	0.86156	0.8	0.10136	0	0	0.587584	0.239514	68.2	27.8	2.45	6000	3096	2406	354	126	1.63655	20.0238	1.30841	24.1846	13.5543	17.9634
Never smoker	12	88.8	10.656	11	1.32	0.2	0.024	0	0	0.61512	0.42372	46.6	32.1	1.45	7300	3730.3	2511.2	781.1	248.2	0.35	12.548	0.05	14.4717	11.2952	6.25

## Sheet: All MAC Pt
Segment	smoking history	type	Severity of Bronchiectasis	Severity of Bronchial wall thickening	Extent of bronchiectasis(number)	Extent of bronchiectasis(score)	Extent of multiple nodules or small nodules(number)	Extent of multiple nodules or small nodules(score)	Sacculations or abscesses(number)	Sacculations or abscesses(score)	Extent of mosaic perfusion(number)	Extent of mosaic perfusion(score)	Extent of mosaic perfusion(number)	Extent of mosaic perfusion(score)	Total lung score	Severity of Bronchiectasis(Lavaged lung)	Severity of bronchial wall thickening(Lavaged lung)	Extent of bronchiectasis(score)(Lavaged lung)	Extent of multiple nodules or small nodules(score)(Lavaged Lung)	Sacculations or abscesses(score)(Lavaged lung)	Extent of mosaic perfusion(score)(Lavaged Lung)	Collapse or consolidation(score)(Lavaged Lung)	Segment score	extent of disease (HRCT segment)	Number of segment	Number of lobes	follow up	prognosis	Total cell count(x104/ml BALF)	BAL CD4(%)	BAL CD8(%)	BAL CD4/CD8	Macrophases(%)	Macrophages(x10^4/ml)	Lymphocytes(%)	Lymphocytes(x10^4/ml)	Neutrophils(%)	Neutrophils(x10^4/ml)	Eosinophils(%)	Eosionphils(x10^4/ml)	bacterias	CD4+ lymphocytes(x104/ml BALF)	CD8+ lymphocytes(x104/ml BALF)	peripheral white blood cells(/µl)	peripheral neutrophils(/µl)	peripheral lymphocytes(/µl)	peripheral monocytes(/µl)	peripheral eosinophils(/µl)	BAL IL-6 (pg/ml)
Rt S4	Never smoker	Net	2	1	9	2	8	2	6	2	0	0	0	0	9	2	1	3	2	2	0	0	10	R2, R4, R5, R8, R9, R10, L4, L5, L6,	9	5	Yes	Deteriorated	191.4	80.1	16.1	4.98	12.2	23.3508	4.8	9.1872	83	158.862	0	0	Mycobacterium avium	7.35895	1.47914	4100	2845.4	1008.6	241.9	4.1	0.35
Lt S5	Never smoker	Net	1	1	6	2	9	2	2	1	0	0	2	1	8	1	1	2	3	2	0	1	10	R2, R3, R4, R5, R6, L1+2, L4, L5, L6, L8	10	6	No	-	68	65.4	26.4	2.48	28	19.04	4	2.72	68	46.24	0	0	Mycobacterium avium	1.77888	0.71808	5100	3804.6	1025.1	209.1	20.4	0.35
Lt S5	Never smoker	Net	1	1	1	1	12	3	1	1	1	1	1	1	9	2	2	2	2	1	0	1	10	R2, R4, R5, R6, R7, R8, R9, R10, L1+2, L5, L6	10	5	Yes	Deteriorated	24.4	66.9	24.9	2.69	56.3	13.7372	4.7	1.1468	37.4	9.1256	1.6	0.3904	Mycobacterium avium	0.767209	0.285553	5200	3276	1487.2	343.2	62.4	8.26654
Rt S6	Ex-smoker	Net	1	1	1	1	1	1	1	1	0	0	0	0	5	1	1	1	1	1	0	0	5	R6	1	1	Yes	Deteriorated	2	83.9	15.1	5.56	82.7	1.654	6.9	0.138	10.4	0.208	0	0	Mycobacterium avium	0.115782	0.020838	6400	4128	1766.4	352	121.6	7.0384
Rt S5	Never smoker	Net	1	1	3	1	11	3	3	1	6	2	4	2	11	1	1	1	1	1	2	1	8	R2, R4, R5, R8, R9, R10, L3, L4, L5, L9	10	6	No	-	47.6	70.8	20.1	3.52	47.6	22.6576	18.2	8.6632	34.2	16.2792	0	0	Mycobacterium avium	6.13355	1.7413	6200	4073.4	1798	254.2	55.8	7.19177
Rt S5	Never smoker	Ly	1	1	3	1	10	3	2	1	0	0	0	0	7	1	1	1	1	0	0	0	4	R2, R3, R4, R5, R6, R9, L4, L6, L9, L10	10	5	Yes	Deteriorated	14	83.3	10.2	8.17	40.5	5.67	59.5	8.33	0	0	0	0	Mycobacterium avium	6.93889	0.84966	4000	1940	1516	328	188	4.90193
Lt S45	Never smoker	Ly	0	0	0	0	1	1	0	0	0	0	0	0	1	0	0	0	1	0	0	0	1	R4, R5	2	1	Yes	Stable	8.62	60	34	1.76	88.7	7.64594	10.6	0.91372	0.7	0.06034	0	0	Mycobacterium avium	0.548232	0.310665	5800	3973	1415.2	336.4	52.2	8.988
Rt S3	Ex-smoker	Net	1	1	2	1	2	1	0	0	0	0	0	0	4	1	1	1	1	0	0	0	4	R2, L4	2	1	No	-	38.1	58.3	29.2	2	40.6	15.4686	15.8	6.0198	42.8	16.3068	0.8	0.3048	Mycobacterium avium	3.50954	1.75778	4900	2695	1813	147	196	8.18739
Lt S5	Never smoker	Net	1	1	4	1	4	1	1	1	1	1	4	2	8	1	1	1	1	1	1	2	8	R2, R4, L4, L5	4	3	Yes	Stable	100.3	72.5	17.9	4.05	13.6	13.6408	18	18.054	68.4	68.6052	0	0	Mycobacterium avium	13.0892	3.23167	4800	2832	1684.8	220.8	19.2	8.683
Rt S5	Never smoker	Net	2	1	2	1	11	3	1	1	0	0	1	1	9	2	1	3	2	0	0	1	9	R3, R4, R5, R6, R7, R8, R9, R10, L10, L4, L6	11	5	No	-	108	45.8	29.8	1.56	0.8	0.864	0	0	98.2	106.056	1	1.08	Mycobacterium intracellulare	0	0	5400	2635.2	2154.6	383.4	205.2	7.93445
Rt S5	Never smoker	Ly	1	1	1	1	0	0	0	0	0	0	1	1	4	1	1	1	0	0	0	1	4	R4	1	1	No	-	7.68	73.2	22.7	3.22	57.6	4.42368	41.2	3.16416	1	0.0768	0	0	Mycobacterium avium	2.31617	0.718264	4200	2646	1323	159.6	50.4	0.35
Rt S5	Never smoker	Ly	0	0	0	0	3	1	0	0	0	0	0	0	1	0	0	2	0	0	0	0	2	R2, R3, R5,	3	2	Yes	Deteriorated	7.44	76.7	19.7	3.89	58	4.3152	41.4	3.08016	0.6	0.04464	0	0	Mycobacterium avium	2.36248	0.606792	6300	4479.3	1348.2	365.4	37.8	0.35
Rt S2	Never smoker	Ly	0	0	0	0	2	1	0	0	0	0	0	0	1	0	0	0	1	0	0	0	1	R2, L4	2	2	No	-	5.17	74.7	17.4	4.29	82.4	4.26008	17.2	0.88924	0.4	0.02068	0	0	Mycobacterium avium	0.664262	0.154728	5600	3908.8	1400	168	100.8	2.40972
Lt S4	Never smoker	Net	2	1	6	2	13	3	10	3	0	0	2	1	12	1	1	1	3	2	0	0	8	R1, R2, R3, R4, R5, R7, R10, L1+2, L3, L4, L5, L6, L8, L9, L10	15	6	No	-	247.27	48	10.1	4.75	4.4	10.8799	2.8	6.92356	92.4	228.477	0.4	0.98908	Mycobacterium avium	3.32331	0.69928	6300	4851	1064.7	321.3	31.5	11.08
Rt S5	Never smoker	Ly	0	0	0	0	0	0	1	1	0	0	0	0	1	0	0	0	0	1	0	0	1	R5	1	1	Yes	Stable	24.75	93.3	7.8	11.96	68.4	16.929	29.2	7.227	2	0.495	0.4	0.099	Mycobacterium avium	6.74279	0.563706	4900	3263.4	1087.8	347.9	181.3	0.35
Rt S5	Ex-smoker	Ly	1	1	1	1	2	1	0	0	0	0	0	0	4	1	1	1	0	0	0	0	3	R4, R5	2	1	No	-	76.31	73.4	21.2	3.46	46	35.1026	53.6	40.9022	0.4	0.30524	0	0	Mycobacterium avium	30.0222	8.67126	3800	2181.2	1402.2	159.6	38	7.31431
Rt S3	Never smoker	Ly	1	1	1	1	6	2	0	0	0	0	1	1	6	0	0	0	1	0	0	0	1	R4, R5, L4, L5, L6	5	3	Yes	Stable	9.03	83.9	11.5	7.3	82.3	7.43169	16.3	1.47189	0.7	0.06321	0.7	0.06321	Mycobacterium intracellulare	1.23492	0.169267	5000	3815	810	325	30	0.35
Rt S6	Never smoker	Net	1	1	2	1	5	1	3	1	0	0	3	1	6	0	0	0	0	0	0	0	0	R2, R4, R5, R6, L6, R1	5	4	No	-	22	74	21.2	3.49	25.9	5.698	8.7	1.914	65.4	14.388	0	0	Mycobacterium avium	1.41636	0.405768	5900	4218.5	1168.2	483.8	11.8	0.35
Rt S5	Current smoker	Net	1	1	4	1	5	1	3	1	0	0	1	1	6	0	0	0	0	0	0	0	0	R2, R4, R5, L4, L5	5	3	No	-	76.2	68.7	24.7	2.78	14.5	11.049	1.5	1.143	84	64.008	0.5	0.381	Mycobacterium avium	0.785241	0.282321	6000	4020	1440	540	0	2.6088
Rt S3	Never smoker	Ly	1	1	1	1	2	1	1	1	0	0	0	0	5	0	0	0	0	0	0	0	0	R4, L3	2	2	Yes	Stable	23.9	69.2	28.9	2.39	29.2	6.9788	66.5	15.8935	4.3	1.0277	0	0	Mycobacterium avium	10.9983	4.59322	6200	3007	2697	378.2	74.4	0.35
Rt S2	Never smoker	Ly	0	0	0	0	4	1	0	0	0	0	0	0	1	1	0	1	1	0	0	0	3	R2, R4, R6, L1+2	4	4	Yes	Stable	6.9	70.5	23.2	3.04	61	4.209	30	2.07	7	0.483	1.7	0.1173	Mycobacterium avium	1.45935	0.48024	4700	2594.4	1767.2	249.1	70.5	5.36803
Lt S4	Never smoker	Ly	1	0	2	1	3	1	1	1	0	0	0	0	4	1	0	1	1	0	0	0	3	L4, L5, R4	3	2	Yes	Stable	13.5	71.4	22.6	3.16	82.4	11.124	16.9	2.2815	0.7	0.0945	0	0	Mycobacterium intracellulare	1.62899	0.515619	4700	3506.2	907.1	249.1	23.5	7.07508
Rt S5	Ex-smoker	Net	2	1	6	2	12	3	3	1	0	0	2	1	10	2	2	3	3	1	0	1	12	R1, R2, R3, R4, R5, R8, R10, L6, L4, L5, L9, L10	12	5	Yes	Deteriorated	16.04	77.3	17.4	4.44	84.4	13.5378	3.9	0.62556	11.7	1.87668	0	0	Mycobacterium intracellulare	0.483558	0.108847	6100	4032.1	1616.5	359.9	61	3.6147
Rt S5	Never smoker	Ly	1	1	3	1	1	1	1	1	0	0	1	1	6	1	1	1	1	0	0	1	5	R2, R3, R5, L4	4	3	No	-	25.88	61.7	37.4	1.65	30	7.764	57.1	14.7775	7.3	1.88924	0	0	Mycobacterium avium	9.11771	5.52678	4200	2536.8	1352.4	180.6	109.2	8.83111
Rt S4	Never smoker	Ly	0	0	0	0	2	1	0	0	0	0	0	0	1	1	1	1	1	0	0	0	4	R4, R8	2	2	Yes	Stable	8.69	67	26.5	2.53	61.3	5.32697	35	3.0415	3.7	0.32153	0	0	Mycobacterium avium	2.03781	0.805997	5000	2965	1785	150	70	3.10693
Rt S4	Ex-smoker	Net	2	2	10	3	10	3	6	2	0	0	3	1	13	2	2	2	3	1	0	1	11	R2, R3, R4, R9, R10, L4, L5, L8, L9, L10	10	5	No	-	52.9	-	-	-	2	1.058	1	0.529	97.1	51.3659	0	0	Mycobacterium avium	0	0	4900	3111.5	1494.5	142.1	122.5	1.90061
Lt S5	Ex-smoker	Ly	0	0	0	0	2	1	1	1	0	0	0	0	2	0	0	0	1	0	0	0	1	R5, L5	2	2	Yes	Stable	18.9	70.8	21.1	3.38	99.2	18.7488	0.4	0.0756	0.3	0.0567	0	0	Mycobacterium avium	0.0535248	0.0159516	8700	5881.2	2053.2	565.5	156.6	0.9344
Rt S5	Never smoker	Ly	1	1	5	1	5	1	1	1	0	0	1	1	6	2	1	2	1	1	0	1	8	R3, R4, R5, L4, L5	5	3	No	-	8.52	54.2	39.6	1.37	47.1	4.01292	45.4	3.86808	7.5	0.639	0	0	Mycobacterium avium	2.0965	1.53176	4300	2489.7	1543.7	197.8	38.7	14.8973
Lt S5	Never smoker	Ly	1	0	2	1	2	1	0	0	0	0	0	0	3	1	1	1	1	0	0	0	4	R5, L5	2	2	Yes	Stable	37.24	76.7	24.8	3.09	78.8	29.3451	11	4.0964	5.6	2.08544	4.6	1.71304	Mycobacterium avium	3.14194	1.01591	7400	4854.4	1835.2	525.4	177.6	3.67619
Lt low	Ex-smoker	Ly	0	0	0	0	5	1	0	0	0	0	0	0	1	1	0	1	1	0	0	0	3	R1, R2, R7, R10, L1+2	5	3	Yes	Stable	2.59	43.5	45.6	0.95	90.5	2.34395	8.6	0.22274	0.8	0.02072	0	0	Mycobacterium avium	0.0968919	0.101569	4100	2952	615	123	410	2.08215
Rt S6	Never smoker	Net	1	1	2	1	10	3	1	1	0	0	1	1	8	0	0	0	1	0	0	1	2	R1, R2, R4, R5, R8, R9, R10, L1+2, L6, L4	10	6	No	-	17.7	73	19.7	3.71	76	13.452	7.6	1.3452	16.4	2.9028	0	0	Mycobacterium avium	0.981996	0.265004	3100	1798	868	217	62	7.67733
Rt low	Never smoker	Ly	0	0	0	0	5	1	0	0	0	0	1	1	2	1	1	1	1	0	0	1	5	R3, R5, R8, R9, R10	5	3	Yes	Stable	35.6	84.3	10.8	7.81	82.2	29.2632	9.6	3.4176	6.6	2.3496	0	0	Mycobacterium avium	2.88104	0.369101	4100	3075	492	369	164	0.35
Lt S4	Never smoker	Ly	0	0	0	0	3	1	0	0	0	0	1	1	2	1	1	1	1	0	0	0	4	R1, R4, R5	3	2	Yes	Stable	72.8	73.1	25.8	2.83	58.6	42.6608	35.4	25.7712	1.2	0.8736	4.8	3.4944	Mycobacterium avium	18.8387	6.64897	4500	2848.5	1107	310.5	202.5	13.5377
Rt S2	Never smoker	Ly	1	1	1	1	5	1	0	0	0	0	0	0	4	1	1	1	1	1	0	0	5	R2, R4, R5, R10, L4	5	4	Yes	Stable	5.25	87	11.6	7.5	92	4.83	7	0.3675	1	0.0525	0	0	Mycobacterium avium	0.319725	0.04263	5300	3895.5	964.6	360.4	58.3	3.46087
Rt S5	Never smoker	Net	1	1	1	1	6	2	1	1	0	0	1	1	7	1	1	3	3	1	0	1	10	R1, R4, R5, R6, R7, R8	6	3	Yes	Deteriorated	49.35	67.8	24.8	2.73	21.4	10.5609	4	1.974	74.6	36.8151	0	0	Mycobacterium avium	1.33837	0.489552	4800	3609.6	859.2	220.8	100.8	2.81816
Rt S2	Never smoker	Ly	1	1	1	1	2	1	1	1	0	0	0	0	5	1	1	1	1	1	0	0	5	R2, R6	2	2	Yes	Stable	27.6	80.3	16.5	4.87	82.3	22.7148	10.4	2.8704	7.3	2.0148	0	0	Mycobacterium avium	2.30493	0.473616	4800	2347.2	2184	211.2	48	2.08078
Rt S5	Never smoker	Ly	1	1	1	1	3	1	0	0	0	0	1	1	5	1	1	1	1	0	0	1	5	R4, R5, L5	3	2	No	-	26.6	64	30.8	2.08	57.6	15.3216	30.8	8.1928	13.6	3.6176	0.9	0.2394	Mycobacterium avium	5.24339	2.52338	5900	3994.3	1734.6	141.6	11.8	4.6063
[truncated: 5 more columns]

## Sheet: MAC Pt (followed-up)
Segment	smoking history	type	Severity of Bronchiectasis (before)	Severity of Bronchial wall thickening (before)	Extent of bronchiectasis(number) (before)	Extent of bronchiectasis(score) (before)	Extent of multiple nodules or small nodules(number) (before)	Extent of multiple nodules or small nodules(score) (before)	Sacculations or abscesses(number) (before)	Sacculations or abscesses(score) (before)	Extent of mosaic perfusion(number) (before)	Extent of mosaic perfusion(score) (before)	Extent of mosaic perfusion(number) (before)	Extent of mosaic perfusion(score) (before)	Total lung score (before)	Severity of Bronchiectasis(Lavaged lung) (before)	Severity of bronchial wall thickening(Lavaged lung) (before)	Extent of bronchiectasis(score)(Lavaged lung) (before)	Extent of multiple nodules or small nodules(score)(Lavaged Lung)	Sacculations or abscesses(score)(Lavaged lung) (before)	Extent of mosaic perfusion(score)(Lavaged Lung) (before)	Collapse or consolidation(score)(Lavaged Lung) (before)	Segment score (before)	extent of disease (HRCT segment)	Number of segment	Number of lobes	follow up	prognosis	Severity of Bronchiectasis (after)	Severity of Bronchial wall thickening (after)	Extent of bronchiectasis(number) (after)	Extent of bronchiectasis(score) (after)	Extent of multiple nodules or small nodules(number) (after)	Extent of multiple nodules or small nodules(score) (after)	Sacculations or abscesses(number) (after)	Sacculations or abscesses(score) (after)	Extent of mosaic perfusion(number) (after)	Extent of mosaic perfusion(score) (after)	Extent of mosaic perfusion(number) (after)	Extent of mosaic perfusion(score) (after)	Total lung score (after)	Severity of Bronchiectasis(Lavaged lung) (after)	Severity of bronchial wall thickening(Lavaged lung) (after)	Extent of bronchiectasis(score)(Lavaged lung) (after)	Extent of multiple nodules or small nodules(score)(Lavaged Lung) (after)	Sacculations or abscesses(score)(Lavaged lung) (after)	Extent of mosaic perfusion(score)(Lavaged Lung) (after)	Collapse or consolidation(score)(Lavaged Lung) (after)	Segment score (after)
Rt S4	Never smoker	Net	2	1	9	2	8	2	6	2	0	0	0	0	9	2	1	3	2	2	0	0	10	R2, R4, R5, R8, R9, R10, L4, L5, L6,	9	5	Yes	Deteriorated	2	1	9	2	11	3	9	2	0	0	0	0	10	2	1	3	3	3	0	0	12
Lt S5	Never smoker	Net	1	1	1	1	12	3	1	1	1	1	1	1	9	2	2	2	2	1	0	1	10	R2, R4, R5, R6, R7, R8, R9, R10, L1+2, L5, L6	10	5	Yes	Deteriorated	2	1	2	1	12	3	1	1	1	1	1	1	10	3	2	2	2	1	0	1	11
Rt S6	Ex-smoker	Net	1	1	1	1	1	1	1	1	0	0	0	0	5	1	1	1	1	1	0	0	5	R6	1	1	Yes	Deteriorated	2	1	3	1	1	1	1	1	0	0	1	1	7	2	1	2	1	1	0	2	9
Rt S5	Never smoker	Ly	1	1	3	1	10	3	2	1	0	0	0	0	7	1	1	1	1	0	0	0	4	R2, R3, R4, R5, R6, R9, L4, L6, L9, L10	10	5	Yes	Deteriorated	1	1	3	1	12	3	7	2	0	0	0	0	8	1	1	1	1	0	0	0	4
Lt S45	Never smoker	Ly	0	0	0	0	1	1	0	0	0	0	0	0	1	0	0	0	1	0	0	0	1	R4, R5	2	1	Yes	Stable	0	0	0	0	1	1	0	0	0	0	0	0	1	0	0	0	1	0	0	0	1
Lt S5	Never smoker	Net	1	1	4	1	4	1	1	1	1	1	4	2	8	1	1	1	1	1	1	2	8	R2, R4, L4, L5	4	3	Yes	Stable	1	1	4	1	4	1	1	1	1	1	3	1	7	1	1	1	1	1	1	2	8
Rt S5	Never smoker	Ly	0	0	0	0	3	1	0	0	0	0	0	0	1	0	0	2	0	0	0	0	2	R2, R3, R5,	3	2	Yes	Deteriorated	1	1	1	1	6	2	1	1	0	0	0	0	6	0	0	2	2	1	0	0	5
Rt S5	Never smoker	Ly	0	0	0	0	0	0	1	1	0	0	0	0	1	0	0	0	0	1	0	0	1	R5	1	1	Yes	Stable	0	0	0	0	0	0	1	1	0	0	0	0	1	0	0	0	0	1	0	0	1
Rt S3	Never smoker	Ly	1	1	1	1	6	2	0	0	0	0	1	1	6	0	0	0	1	0	0	0	1	R4, R5, L4, L5, L6	5	3	Yes	Stable	1	1	1	1	6	2	0	0	0	0	1	1	6	0	0	0	1	0	0	0	1
Rt S3	Never smoker	Ly	1	1	1	1	2	1	1	1	0	0	0	0	5	0	0	0	0	0	0	0	0	R4, L3	2	2	Yes	Stable	1	1	1	1	2	1	1	1	0	0	0	0	5	0	0	0	0	0	0	0	0
Rt S2	Never smoker	Ly	0	0	0	0	4	1	0	0	0	0	0	0	1	1	0	1	1	0	0	0	3	R2, R4, R6, L1+2	4	4	Yes	Stable	0	0	0	0	4	1	0	0	0	0	0	0	1	1	0	1	1	0	0	0	3
Lt S4	Never smoker	Ly	1	0	2	1	3	1	1	1	0	0	0	0	4	1	0	1	1	0	0	0	3	L4, L5, R4	3	2	Yes	Stable	1	0	2	1	3	1	1	1	0	0	0	0	4	1	0	1	1	0	0	0	3
Rt S5	Ex-smoker	Net	2	1	6	2	12	3	3	1	0	0	2	1	10	2	2	3	3	1	0	1	12	R1, R2, R3, R4, R5, R8, R10, L6, L4, L5, L9, L10	12	5	Yes	Deteriorated	2	1	6	2	12	3	6	2	0	0	4	2	12	2	2	3	3	1	0	1	12
Rt S4	Never smoker	Ly	0	0	0	0	2	1	0	0	0	0	0	0	1	1	1	1	1	0	0	0	4	R4, R8	2	2	Yes	Stable	0	0	0	0	2	1	0	0	0	0	0	0	1	1	1	1	1	0	0	0	4
Lt S5	Ex-smoker	Ly	0	0	0	0	2	1	1	1	0	0	0	0	2	0	0	0	1	0	0	0	1	R5, L5	2	2	Yes	Stable	0	0	0	0	2	1	1	1	0	0	0	0	2	0	0	0	1	0	0	0	1
Lt S5	Never smoker	Ly	1	0	2	1	2	1	0	0	0	0	0	0	3	1	1	1	1	0	0	0	4	R5, L5	2	2	Yes	Stable	1	0	2	1	2	1	0	0	0	0	0	0	3	1	1	1	1	0	0	0	4
Lt low	Ex-smoker	Ly	0	0	0	0	5	1	0	0	0	0	0	0	1	1	0	1	1	0	0	0	3	R1, R2, R7, R10, L1+2	5	3	Yes	Stable	0	0	0	0	5	1	0	0	0	0	0	0	1	1	0	1	1	0	0	0	3
Rt low	Never smoker	Ly	0	0	0	0	5	1	0	0	0	0	1	1	2	1	1	1	1	0	0	1	5	R3, R5, R8, R9, R10	5	3	Yes	Stable	0	0	0	0	5	1	0	0	0	0	1	1	2	1	1	1	1	0	0	1	5
Lt S4	Never smoker	Ly	0	0	0	0	3	1	0	0	0	0	1	1	2	1	1	1	1	0	0	0	4	R1, R4, R5	3	2	Yes	Stable	0	0	0	0	3	1	0	0	0	0	1	1	2	1	1	1	1	0	0	0	4
Rt S2	Never smoker	Ly	1	1	1	1	5	1	0	0	0	0	0	0	4	1	1	1	1	1	0	0	5	R2, R4, R5, R10, L4	5	4	Yes	Stable	1	1	1	1	5	1	0	0	0	0	0	0	4	1	1	1	1	1	0	0	5
Rt S5	Never smoker	Net	1	1	1	1	6	2	1	1	0	0	1	1	7	1	1	3	3	1	0	1	10	R1, R4, R5, R6, R7, R8	6	3	Yes	Deteriorated	1	1	1	1	10	3	6	2	0	0	1	1	9	1	1	3	3	1	0	1	10
Rt S2	Never smoker	Ly	1	1	1	1	2	1	1	1	0	0	0	0	5	1	1	1	1	1	0	0	5	R2, R6	2	2	Yes	Stable	1	1	1	1	2	1	1	1	0	0	0	0	5	1	1	1	1	1	0	0	5
[truncated: 26 more columns]
