# Supplementary material
Source: publisher figshare collection journal article supplement (https://plos.figshare.com/articles/dataset/_/5855031)
Supplement: Supplementary file 1 [file 1 › S1 Table.pdf]

S1 Table. Summary of the HRCT scoring system of the whole lung

| Category                                                       | Score  |                                           |                                                |                                           |
|----------------------------------------------------------------|--------|-------------------------------------------|------------------------------------------------|-------------------------------------------|
|                                                                | 0      | 1                                         | 2                                              | 3                                         |
| Severity of Bronchiectasis                                     | Absent | Mild (1-2 x diameter of adjacent vessel)  | Moderate (2-3 x diameter of adjacent vessel)   | Severe (>3 x diameter of adjacent vessel) |
| Severity of bronchial wall thickening                          | Absent | Mild (<0.5 x diameter of adjacent vessel) | Moderate (0.5-1 x diameter of adjacent vessel) | Severe (>1 x diameter of adjacent vessel) |
| Extent of bronchiectasis<br>(No. of BPs)                       | Absent | 1-5                                       | 6-9                                            | >9                                        |
| Extent of multiple nodules<br>or small nodules<br>(No. of BPs) | Absent | 1-5                                       | 6-9                                            | >9                                        |
| Sacculations or abscesses<br>(No. of BPs)                      | Absent | 1-5                                       | 6-9                                            | >9                                        |
| Extent of mosaic perfusion<br>(No. of BPs)                     | Absent | 1-5                                       | 6-9                                            | >9                                        |
| Collapse or consolidation<br>(No. of BPs)                      | Absent | 1-3                                       | 4-6                                            | >6                                        |

BPs; bronchopulmonary segments.
