# Supplementary material
Source: publisher figshare collection journal article supplement (https://plos.figshare.com/articles/dataset/_/5855031)
Supplement: Supplementary file 1 [file 1 › S2 Table.pdf]

S2 Table. Peripheral white blood cell differentiation of the groups

|                                          | Control<br>(N=16*) | MAC patients  |              |              | P value            |           |
|------------------------------------------|--------------------|---------------|--------------|--------------|--------------------|-----------|
|                                          |                    | All<br>(N=37) | LD<br>(N=22) | ND<br>(N=15) | Control<br>vs. MAC | LD vs. ND |
| White blood cells (x10 <sup>4</sup> /ml) | 5506 ± 317         | 5208 ± 178    | 5159 ± 256   | 5280 ± 236   | 0.39               | 0.74      |
| Neutrophils (x10 <sup>4</sup> /ml)       | 3250 ± 228         | 3381 ± 146    | 3325 ± 204   | 3462 ± 208   | 0.63               | 0.65      |
| Lymphocytes (x10 <sup>4</sup> /ml)       | 1625 ± 121         | 1421 ± 77     | 1424 ± 112   | 1416 ± 103   | 0.16               | 0.96      |
| Monocytes (x10 <sup>4</sup> /ml)         | 394 ± 42           | 288 ± 19      | 281 ± 26     | 295 ± 30     | 0.01               | 0.73      |
| Eosinophils (x10 <sup>4</sup> /ml)       | 219 ± 40           | 91 ± 14       | 104 ± 19     | 71 ± 17      | <0.001             | 0.24      |

Data are presented as mean ± SEM.

\*Of 22 subjects, 16 samples were available for peripheral blood analysis

LD; Lymphocyte-dominant group, ND; Neutrophil-dominant group.
