# Supplementary material
Source: publisher figshare collection journal article supplement (https://plos.figshare.com/articles/dataset/_/5855031)
Supplement: Supplementary file 1 [file 1 › S3 Table.pdf]

S3 Table. Cohen's Kappa values for HRCT scores of lavaged pulmonary segments

|                                             | Kappa value | 95%CI         |
|---------------------------------------------|-------------|---------------|
| Severity of bronchiectasis                  | 0.532       | 0.288 - 0.776 |
| Severity of bronchial wall thickening       | 0.466       | 0.237 – 0.695 |
| Extent of bronchiectasis                    | 0.614       | 0.402 – 0.826 |
| Extent of multiple nodules or small nodules | 0.806       | 0.627 – 0.985 |
| Sacculations or abscesses                   | 0.896       | 0.758 – 1.034 |
| Extent of mosaic perfusion                  | 1.000       | —             |
| Collapse or consolidation                   | 0.944       | 0.839 – 1.049 |
