# Supplementary material
Source: publisher figshare collection journal article supplement (https://plos.figshare.com/articles/dataset/_/5855031)
Supplement: Supplementary file 1 [file 1 › S4 Table.pdf]

S4 Table. Cohen's kappa values for HRCT scores of the whole lung

|                                             | Kappa value | 95%CI         |
|---------------------------------------------|-------------|---------------|
| Severity of bronchiectasis                  | 0.506       | 0.269 - 0.744 |
| Severity of bronchial wall thickening       | 0.515       | 0.256 – 0.775 |
| Extent of bronchiectasis                    | 0.786       | 0.631 – 0.941 |
| Extent of multiple nodules or small nodules | 0.754       | 0.568 – 0.941 |
| Sacculations or abscesses                   | 0.705       | 0.491 – 0.918 |
| Extent of mosaic perfusion                  | 0.789       | 0.390 – 1.189 |
| Collapse or consolidation                   | 0.624       | 0.385 – 0.862 |
