# Supplementary material
Source: publisher figshare collection journal article supplement (https://plos.figshare.com/articles/dataset/_/5855031)
Supplement: Supplementary file 1 [file 1 › S5 Table.pdf]

S5 Table. HRCT score of the whole lung

|                                             | MAC patients  |              |              | P value<br>LD vs. ND |
|---------------------------------------------|---------------|--------------|--------------|----------------------|
|                                             | All<br>(N=37) | LD<br>(N=22) | ND<br>(N=15) |                      |
| Severity of bronchiectasis                  | 0.87 ± 0.63   | 0.55 ± 0.11  | 1.33 ± 0.49  | <0.001               |
| Severity of bronchial wall thickening       | 0.70 ± 0.09   | 0.46 ± 0.11  | 1.07 ± 0.07  | <0.001               |
| Extent of bronchiectasis                    | 0.90 ± 0.09   | 0.55 ± 0.11  | 1.40 ± 0.16  | <0.001               |
| Extent of multiple nodules or small nodules | 1.49 ± 0.12   | 1.05 ± 0.12  | 2.13 ± 0.24  | <0.001               |
| Sacculations or abscesses                   | 0.70 ± 0.12   | 0.36 ± 0.11  | 1.20 ± 0.17  | <0.001               |
| Extent of mosaic perfusion                  | 0.11 ± 0.07   | 0 ± 0        | 0.27 ± 0.15  | 0.04                 |
| Collapse or consolidation                   | 0.57 ± 0.10   | 0.32 ± 0.10  | 0.93 ± 0.15  | 0.001                |
| Total lung score                            | 5.32 ± 0.55   | 3.27 ± 0.44  | 8.33 ± 0.65  | <0.001               |

Data are presented by mean ± SEM.

LD; Lymphocyte-dominant group, ND; Neutrophil-dominant group.
