# Supplementary material
Source: publisher figshare collection journal article supplement (https://plos.figshare.com/articles/dataset/_/5855031)
Supplement: Supplementary file 1 [file 1 › S6 Table.pdf]

S6 Table. Comparisons of HRCT scores of the lavaged pulmonary segment in subjects who were followed-up without treatment before and after the bronchoalveolar lavage (in Stable and Deteriorated group)

|                                             | Stable (N=15) |             | P value | Deteriorated (N=7) |             | P value |
|---------------------------------------------|---------------|-------------|---------|--------------------|-------------|---------|
|                                             | before        | after       |         | before             | after       |         |
| Severity of bronchiectasis                  | 0.67 ± 0.13   | 0.67 ± 0.13 | n.s.    | 1.29 ± 0.29        | 1.57 ± 0.37 | 0.17    |
| Severity of bronchial wall thickening       | 0.47 ± 0.13   | 0.47 ± 0.13 | n.s.    | 1.14 ± 0.26        | 1.14 ± 0.26 | n.s.    |
| Extent of bronchiectasis                    | 0.67 ± 0.13   | 0.67 ± 0.13 | n.s.    | 2.14 ± 0.34        | 2.29 ± 0.29 | 0.36    |
| Extent of multiple nodules or small nodules | 0.87 ± 0.1    | 0.87 ± 0.1  | n.s.    | 1.71 ± 0.42        | 2.14 ± 0.34 | 0.20    |
| Sacculations or abscesses                   | 0.27 ± 0.12   | 0.27 ± 0.12 | n.s.    | 0.86 ± 0.26        | 1.14 ± 0.34 | 0.17    |
| Extent of mosaic perfusion                  | 0.07 ± 0.07   | 0.07 ± 0.07 | n.s.    | 0.0 ± 0.0          | 0.0 ± 0.0   | n.s.    |
| Collapse or consolidation                   | 0.2 ± 0.15    | 0.2 ± 0.15  | n.s.    | 0.43 ± 0.2         | 0.71 ± 0.29 | 0.36    |
| Segment score                               | 3.2 ± 0.55    | 3.2 ± 0.55  | n.s.    | 7.57 ± 1.45        | 9.0 ± 1.23  | 0.06    |

Data are presented by mean ± SEM.
