# Supplementary material
Source: publisher figshare collection journal article supplement (https://plos.figshare.com/articles/dataset/_/5855031)
Supplement: Supplementary file 1 [file 1 › S7 Table.pdf]

S7 Table. Comparisons of HRCT scores of the whole lungs in subjects who were followed-up without treatment before and after the bronchoalveolar lavage (in Stable and Deteriorated group)

|                                             | Stable (N=15) |             | P value | Deteriorated (N=7) |             | P value |
|---------------------------------------------|---------------|-------------|---------|--------------------|-------------|---------|
|                                             | before        | after       |         | before             | after       |         |
| Severity of bronchiectasis                  | 0.47 ± 0.13   | 0.47 ± 0.13 | n.s.    | 1.14 ± 0.26        | 1.57 ± 0.2  | 0.08    |
| Severity of bronchial wall thickening       | 0.33 ± 0.13   | 0.33 ± 0.13 | n.s.    | 0.86 ± 0.14        | 1.0 ± 0.0   | 0.36    |
| Extent of bronchiectasis                    | 0.47 ± 0.13   | 0.47 ± 0.13 | n.s.    | 1.14 ± 0.26        | 1.29 ± 0.18 | 0.36    |
| Extent of multiple nodules or small nodules | 1.0 ± 0.1     | 1.0 ± 0.1   | 0.16    | 2.14 ± 0.34        | 2.57 ± 0.3  | 0.045   |
| Sacculations or abscesses                   | 0.4 ± 0.13    | 0.4 ± 0.13  | 0.33    | 1.0 ± 0.22         | 1.57 ± 0.2  | 0.047   |
| Extent of mosaic perfusion                  | 0.07 ± 0.07   | 0.07 ± 0.07 | n.s.    | 0.14 ± 0.14        | 0.14 ± 0.14 | n.s.    |
| Collapse or consolidation                   | 0.33 ± 0.16   | 0.27 ± 0.12 | 0.33    | 0.43 ± 0.2         | 0.71 ± 0.29 | 0.17    |
| Total Lung score                            | 3.07 ± 0.57   | 3.0 ± 0.53  | 0.33    | 6.86 ± 1.16        | 8.86 ± 0.77 | 0.01    |

Data are presented by mean ± SEM.
