# Supplementary material
Source: publisher figshare collection journal article supplement (https://plos.figshare.com/articles/dataset/_/5855031)
Supplement: Supplementary file 1 [file 1 › S8 Table.pdf]

S8 Table. HRCT score of the whole lungs at baseline who had been followed-up without treatment after the bronchoalveolar lavage

|                                             | MAC patients     |                       | P value |
|---------------------------------------------|------------------|-----------------------|---------|
|                                             | Stable<br>(N=15) | Deteriorated<br>(N=7) |         |
| Severity of bronchiectasis                  | 0.47 ± 0.13      | 1.14 ± 0.26           | 0.02    |
| Severity of bronchial wall thickening       | 0.33 ± 0.13      | 0.86 ± 0.14           | 0.02    |
| Extent of bronchiectasis                    | 0.47 ± 0.13      | 1.14 ± 0.34           | 0.02    |
| Extent of multiple nodules or small nodules | 1.0 ± 0.1        | 2.14 ± 0.34           | <0.001  |
| Sacculations or abscesses                   | 0.4 ± 0.13       | 1.0 ± 0.22            | 0.02    |
| Extent of mosaic perfusion                  | 0.07 ± 0.07      | 0.14 ± 0.14           | 0.58    |
| Collapse or consolidation                   | 0.33 ± 0.16      | 0.43 ± 0.2            | 0.73    |
| Segment score                               | 3.07 ± 0.57      | 6.86 ± 1.16           | 0.003   |

Data are represented as mean ± SEM.

LD; Lymphocyte-dominant group, ND; MAC, Mycobacterium avium complex; Neutrophil-dominant group, HRCT; high-resolution computed tomography.
