# Supplementary material
Source: publisher figshare collection journal article supplement (https://plos.figshare.com/articles/dataset/_/5855031)
Supplement: Supplementary file 1 [file 1 › S9 Table.pdf]

S9 Table. Comparisons of HRCT scores of the lavaged pulmonary segment in subjects who were followed-up without treatment before and after the bronchoalveolar lavage (in LD and ND group)

|                                             | LD group (N=16) |             | P value | ND group (N=6) |              | P value |
|---------------------------------------------|-----------------|-------------|---------|----------------|--------------|---------|
|                                             | before          | after       |         | before         | after        |         |
| Severity of bronchiectasis                  | 0.62 ± 0.13     | 0.62 ± 0.13 | n.s.    | 1.5 ± 0.22     | 1.83 ± 0.31  | 0.17    |
| Severity of bronchial wall thickening       | 0.44 ± 0.13     | 0.44 ± 0.13 | n.s.    | 1.33 ± 0.21    | 1.33 ± 0.21  | n.s.    |
| Extent of bronchiectasis                    | 0.75 ± 0.15     | 0.75 ± 0.15 | n.s.    | 2.17 ± 0.4     | 2.33 ± 0.33  | 0.36    |
| Extent of multiple nodules or small nodules | 0.81 ± 0.1      | 0.94 ± 0.11 | 0.33    | 2.0 ± 0.37     | 2.17 ± 0.4   | 0.36    |
| Sacculations or abscesses                   | 0.19 ± 0.1      | 0.25 ± 0.11 | 0.33    | 1.17 ± 0.17    | 1.33 ± 0.33  | 0.36    |
| Extent of mosaic perfusion                  | 0.0 ± 0.0       | 0.0 ± 0.0   | n.s.    | 0.17 ± 0.17    | 0.17 ± 0.17  | n.s.    |
| Collapse or consolidation                   | 0.06 ± 0.06     | 0.06 ± 0.06 | n.s.    | 0.83 ± 0.31    | 1.17 ± 0.31  | 0.36    |
| Segment score                               | 2.88 ± 0.42     | 3.06 ± 0.43 | 0.33    | 9.17 ± 0.98    | 10.33 ± 0.67 | 0.13    |

Data are presented by mean ± SEM.
