# Supplementary material
Source: publisher figshare collection journal article supplement (https://plos.figshare.com/articles/dataset/_/5855031)
Supplement: Supplementary file 1 [file 1 › S10 Table.pdf]

S10 Table. Comparisons of HRCT scores of the whole lungs in subjects who were followed-up without treatment before and after the bronchoalveolar lavage (in LD and ND group)

|                                             | LD group (N=16) |             | P value | ND group (N=6) |             | P value |
|---------------------------------------------|-----------------|-------------|---------|----------------|-------------|---------|
|                                             | before          | after       |         | before         | after       |         |
| Severity of bronchiectasis                  | 0.44 ± 0.13     | 0.5 ± 0.13  | 0.33    | 1.33 ± 0.21    | 1.67 ± 0.21 | 0.17    |
| Severity of bronchial wall thickening       | 0.31 ± 0.12     | 0.38 ± 0.13 | 0.33    | 1.0 ± 0.0      | 1.0 ± 0.0   | n.s.    |
| Extent of bronchiectasis                    | 0.44 ± 0.13     | 0.5 ± 0.13  | 0.33    | 1.33 ± 0.21    | 1.33 ± 0.21 | n.s.    |
| Extent of multiple nodules or small nodules | 1.13 ± 0.16     | 1.19 ± 0.16 | 0.33    | 2.0 ± 0.37     | 2.33 ± 0.42 | 0.17    |
| Sacculations or abscesses                   | 0.38 ± 0.13     | 0.5 ± 0.16  | 0.16    | 1.17 ± 0.17    | 1.5 ± 0.22  | 0.17    |
| Extent of mosaic perfusion                  | 0.0 ± 0.0       | 0.0 ± 0.0   | n.s.    | 0.33 ± 0.21    | 0.33 ± 0.21 | n.s.    |
| Collapse or consolidation                   | 0.19 ± 0.1      | 0.19 ± 0.1  | n.s.    | 0.83 ± 0.31    | 1.0 ± 0.26  | 0.61    |
| Total Lung score                            | 2.89 ± 0.51     | 3.25 ± 0.56 | 0.25    | 8.0 ± 0.73     | 9.17 ± 0.79 | 0.06    |

Data are presented by mean ± SEM.
