# Supplementary material
Source: publisher figshare collection journal article supplement (https://plos.figshare.com/articles/dataset/_/5855031)
Supplement: Supplementary file 1 [file 1 › S11 Table.pdf]

S11 Table.Cytokine levels in the bronchoalveolar lavage fluid of MAC patients who were followed-up without treatment after the lavage

|                   | MAC patients     |                       | P value<br>Stable vs. Deterioration |
|-------------------|------------------|-----------------------|-------------------------------------|
|                   | Stable<br>(N=15) | Deteriorated<br>(N=7) |                                     |
| IL-6 (pg/ml)      | 4.0 ± 1.0        | 3.9 ± 1.2             | 0.94                                |
| IL-8 (pg/ml)      | 127.3 ± 32.8     | 1163.4 ± 719.2        | 0.04                                |
| IL-12 (pg/ml)     | 1.4 ± 0.2        | 1.1 ± 0.2             | 0.43                                |
| IFN-gamma (pg/ml) | 8.4 ± 3.2        | 5.3 ± 2.2             | 0.53                                |
| IL-22 (pg/ml)     | 9.3 ± 0.9        | 6.0 ± 1.0             | 0.04                                |
| IL-18 (pg/ml)     | 21.5 ± 3.8       | 34.5 ± 22.9           | 0.43                                |
